# Supplementary material for: Cytoprotective Effect of Recombinant Human Erythropoietin Produced in Transgenic Tobacco Plants
Source: PLOS journal article supplement (doi:10.1371/journal.pone.0076468), 2013-10-04
Supplement: S2 (10.1371/journal.pone.0076468.s002) [file journal.pone.0076468.s002]

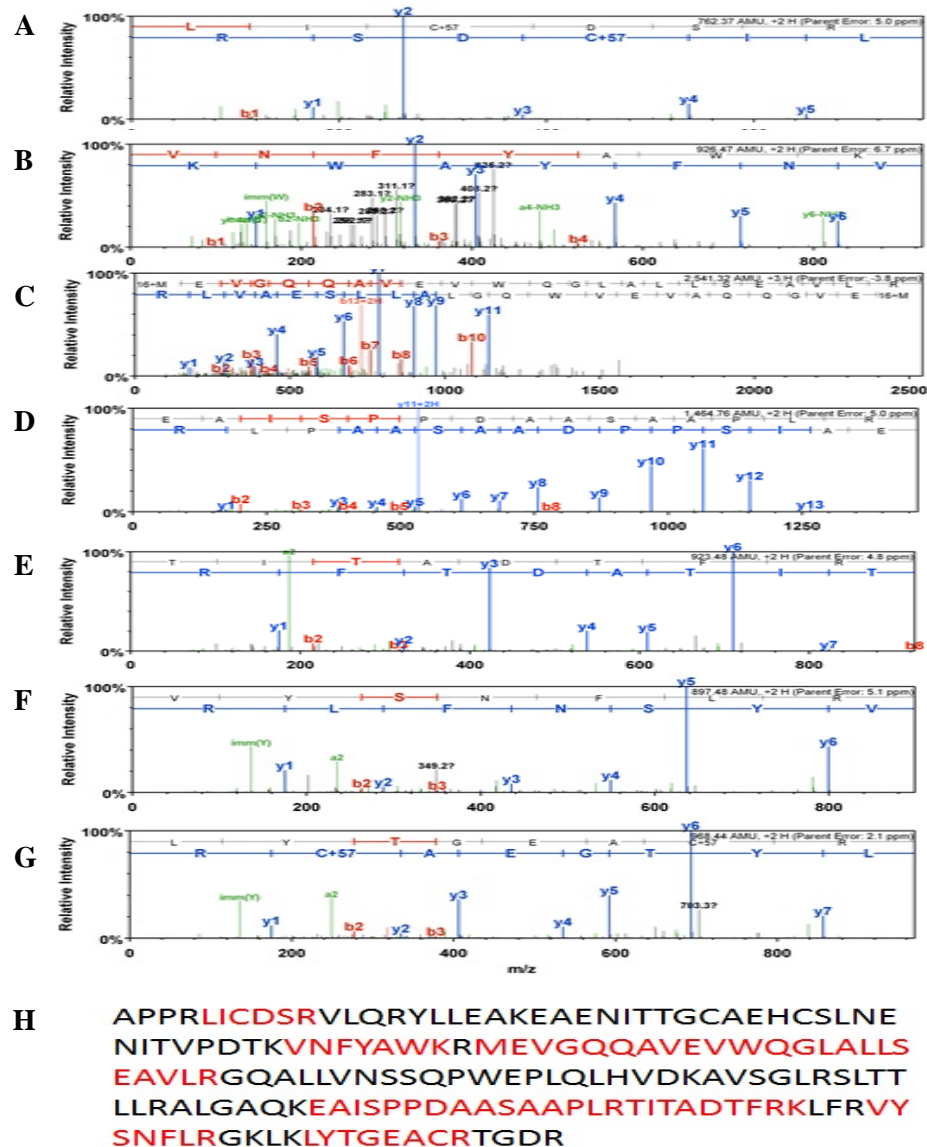

**Figure S2. MS/MS spectra of tryptic peptides derived from 28 kD protein band of plant-produced asialo-rhuEPO (A-G). Each spectrum indicates the amino acid sequence of tryptic peptide whose position in human EPO amino acid sequence is shown in red (H).**
